# Supplementary material
Source: Springer Nature journal article supplement (https://www.springermedizin.de/resource/supplementary/12936_2012_2599_MOESM2_ESM.pdf/9542970)

### DHA

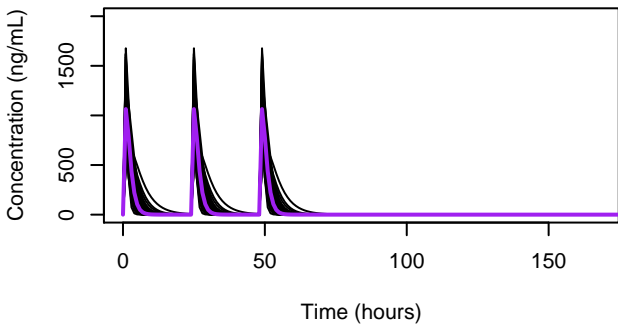

### Mefloquine

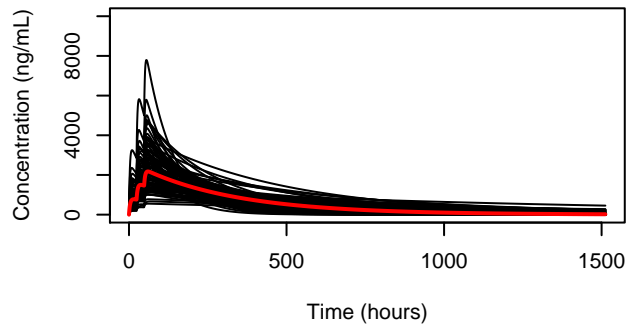

### Artemether

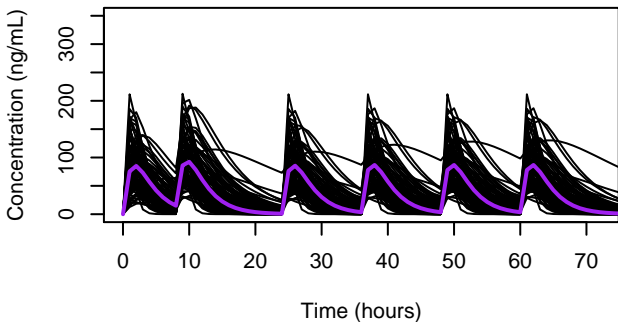

### Lumefantrine

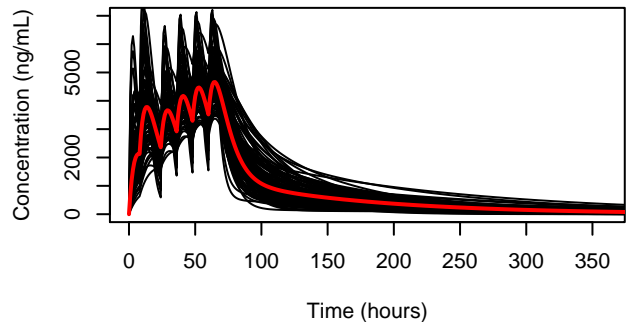

### Piperaquine

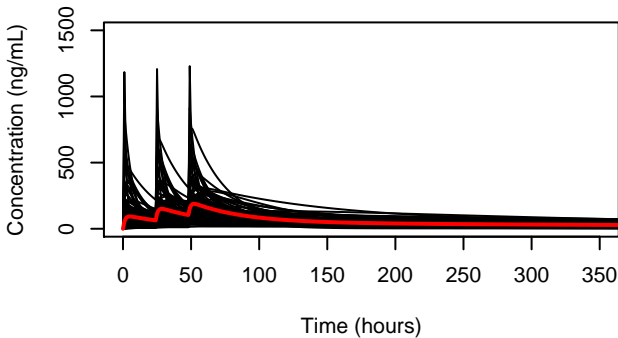

Supplement: MOESM2 [file 9542970]
